# Supplementary material for: Double loading of ZnCl2 by polytopic ligands which co-extract Zn2+ and tetrachloridozincate
Source: Royal Society of Chemistry journal article supplement (doi:10.1039/c0dt00577k), 2010-01-01
Supplement: c0dt00577k.pdf [file c0dt00577k.pdf]

## Double Loading of ZnCl<sub>2</sub> by Polytopic Ligands which Co-extract Zn<sup>2+</sup> and Tetrachloridozincate

Tai Lin, Vesna Gasperov, Kate J. Smith, Christine C. Tong and Peter A. Tasker\*

School of Chemistry, University of Edinburgh, West Mains Road, Edinburgh, UK EH9 3JJ.  
E-mail: Peter.Tasker@ed.ac.uk.

### Supplementary Information

All reagents were used as received, unless otherwise specified.

#### Synthetic details for L<sup>1</sup>-L<sup>3</sup>

**4,4'-Di-*tert*-butyl-6,6'-bis(dihexylaminomethyl)-2,2'-(ethylenedinitrilodimethylidyne)diphenol (L<sup>1</sup>)** To a stirred solution of 5-*tert*-Butyl-3-dihexylaminomethyl-2-hydroxybenzaldehyde<sup>1</sup> (6.44 g, 17 mmol) in ethanol (50 ml) was added a solution of ethylenediamine (0.54 g, 8.9 mmol) in acetonitrile (25 ml). The mixture was stirred overnight and the solvents were removed *in vacuo*. The product was dissolved in dichloromethane (50 ml) and extracted with water (3 × 25 ml). The organic fraction was dried with MgSO<sub>4</sub>, filtered and the solvent removed *in vacuo* to afford a viscous yellow oil (6.54 g, 99%). (Found: C, 77.25; H, 11.5; N, 7.4. Calc. for C<sub>50</sub>H<sub>86</sub>N<sub>4</sub>O<sub>2</sub>: C, 77.5; H, 11.2; N, 7.2%); δ<sub>H</sub> (250 MHz; CDCl<sub>3</sub>; Me<sub>4</sub>Si) 0.87 (12H, t, N(CH<sub>2</sub>)<sub>5</sub>CH<sub>3</sub>), 1.27 (24H, m, NCH<sub>2</sub>CH<sub>2</sub>(CH<sub>2</sub>)<sub>3</sub>CH<sub>3</sub>), 1.30 (18H, s, C(CH<sub>3</sub>)<sub>3</sub>), 1.50 (8H, m, NCH<sub>2</sub>CH<sub>2</sub>(CH<sub>2</sub>)<sub>3</sub>CH<sub>3</sub>), 2.46 (8H, t, NCH<sub>2</sub>(CH<sub>2</sub>)<sub>4</sub>CH<sub>3</sub>), 3.65 (4H, s, ArCH<sub>2</sub>N), 3.92 (4H, s, N(CH<sub>2</sub>)<sub>2</sub>N), 7.19 (2H, d, Ar-*H*), 7.51 (2H, d, Ar-*H*), 8.43 (2H, s, N=CH); ESIMS *m/z* 776 (MH<sup>+</sup>).

**4,4'-Di-*tert*-butyl-2,2'-(ethylenedinitrilodimethylidyne)diphenol (L<sup>2</sup>)** A solution of ethylenediamine (0.54 g, 8.9 mmol) in acetonitrile (25 ml) was added to a stirred solution of 5-*tert*-butyl-2-hydroxybenzaldehyde<sup>2</sup> (3.09 g, 17 mmol) in ethanol (50 ml). The mixture was stirred overnight and the solvents were removed *in vacuo*. The product was dissolved in dichloromethane (50 ml) and extracted with water (3 × 25 ml). The organic fraction was dried with MgSO<sub>4</sub>, filtered and the solvent removed *in vacuo* to afford a viscous yellow solid which was recrystallized from ethanol to afford the product as a light yellow solid (3.12 g, 96%). (Found: C, 75.9; H, 8.45; N, 7.35. Calc. for C<sub>24</sub>H<sub>32</sub>N<sub>2</sub>O<sub>2</sub>: C, 75.75; H, 8.5; N, 7.4%); δ<sub>H</sub> (250 MHz; CDCl<sub>3</sub>; Me<sub>4</sub>Si) 1.29 (18H, s, C(CH<sub>3</sub>)<sub>3</sub>), 3.94 (4H, s, N(CH<sub>2</sub>)<sub>2</sub>N), 6.90 (2H, d, Ar-*H*), 7.21 (2H, d, Ar-*H*), 7.35 (2H, dd, Ar-*H*), 8.37 (2H, s, N=CH); ESIMS *m/z* 381 (MH<sup>+</sup>); mp 161-162 °C.

**1-*tert*-Butyl-4-(dihexylamino)methylbenzene (L<sup>3</sup>)** An excess of dihexylamine (30.0 g, 162 mmol) was added to a solution of 4-*tert*-butylbenzylbromide (11.9 g, 52.5 mmol) in dichloromethane (150 ml) at 0 °C. The mixture was stirred overnight at room temperature and the solvents then removed *in vacuo*. The product was washed with 4 M NaOH aqueous solution (150 ml), extracted with diethyl ether (2 × 50 ml), dried over MgSO<sub>4</sub>, concentrated *in vacuo* and purified by silica-60 wet flash column chromatography (eluting with 10% methanol in dichloromethane) to afford a brown oil (10.8 g, 62%). (Found: C, 83.2; H, 12.2; N, 4.5. Calc. for C<sub>23</sub>H<sub>41</sub>N: C, 83.3; H, 12.3; N, 4.2%); δ<sub>H</sub> (250 MHz; CDCl<sub>3</sub>; Me<sub>4</sub>Si) 0.89 (6H, t, N(CH<sub>2</sub>)<sub>5</sub>CH<sub>3</sub>), 1.28 (12H, m, NCH<sub>2</sub>CH<sub>2</sub>(CH<sub>2</sub>)<sub>3</sub>CH<sub>3</sub>), 1.33 (9H, s, C(CH<sub>3</sub>)<sub>3</sub>), 1.52 (4H, m, NCH<sub>2</sub>CH<sub>2</sub>(CH<sub>2</sub>)<sub>3</sub>CH<sub>3</sub>), 2.48 (4H, t, NCH<sub>2</sub>(CH<sub>2</sub>)<sub>4</sub>CH<sub>3</sub>), 3.62 (2H, s, ArCH<sub>2</sub>N), 7.29 (2H, d, Ar-*H*), 7.35 (2H, d, Ar-*H*); ESIMS *m/z* 332 (MH<sup>+</sup>).

### Loading/stripping data of L<sup>1</sup>

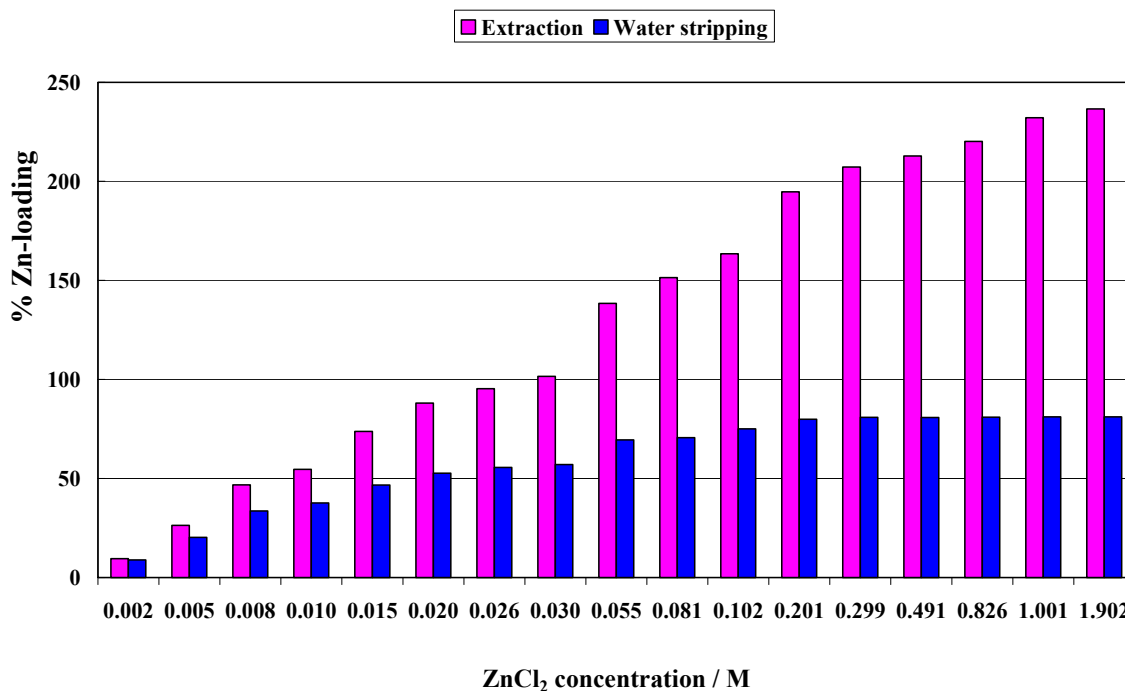

**Fig. S1** Extraction and water stripping by L<sup>1</sup> (0.01 M) from ZnCl<sub>2</sub> solutions of varied concentrations. The 100% Zn loading is based on 0.01 M zinc content in the organic phase.

### Reference

- 1 H. Adams, N. A. Bailey, D. E. Fenton and G. Papageorgiou, *Dalton Trans.*, 1995, 1883-1886.
- 2 R. Aldred, R. Johnston, D. Levin and J. Neilan, *J. Chem. Soc., Perkin Trans. 1*, 1994, 1823-1831.
